# Supplementary material
Source: PubMed Central journal article supplement (PMC1924594)

**a**

| Compound                                                                                                               | m/z [M+H] <sup>+</sup><br>calculated | m/z [M+H] <sup>+</sup><br>observed |
|------------------------------------------------------------------------------------------------------------------------|--------------------------------------|------------------------------------|
| 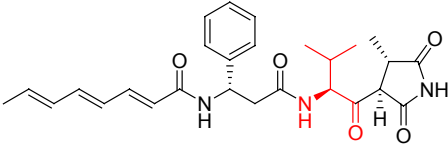<br>andrimid (2)                       | 480.2                                | 480.4                              |
| <br>N-octatrienyl-β-phenylalanine (3) | 286.1                                | 286.1                              |

**b**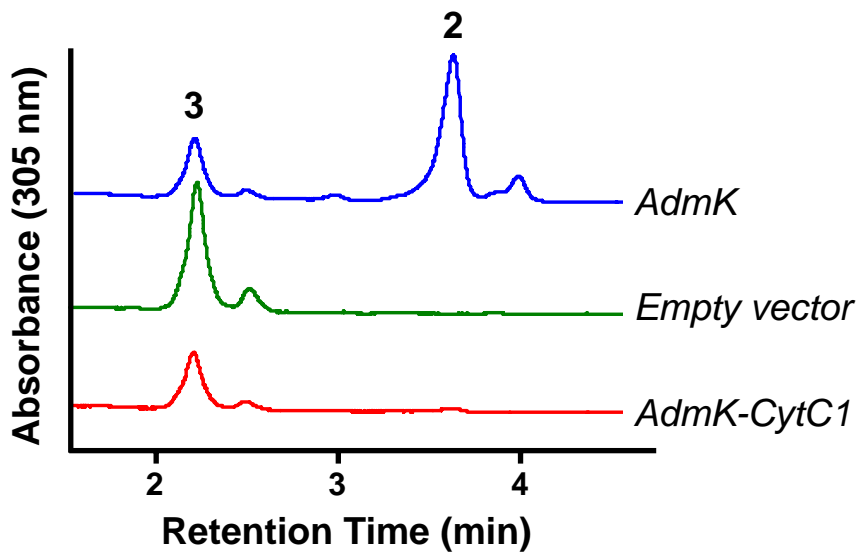

Supplement: pnas_0705348104_3.pdf [file pnas_0705348104_3.pdf]
