# Supplementary material
Source: PubMed Central journal article supplement (PMC1924594)
Supplement: pnas_0705348104_5.pdf [file pnas_0705348104_5.pdf]

|              | 129                                                                                                                                                   | 130 |
|--------------|-------------------------------------------------------------------------------------------------------------------------------------------------------|-----|
|              | 1A-04 TSVDL MSTSEHQQLATFN DTAHPYPRDVL I HQ LIEQQAAQRPDACAVRGDSGPLLTYAELNQANQLAHLRIE L D VEPDTRVAVSLRRGAEMVVAL LGILKAGGAYVPIDPDLPSARQAY                |     |
|              | 1B-06 TSVDL MSTSEHQQLATFN DTAHPYPRDVL I HQ LIEQQAAQRPDACAVRGDSGPLLTYAELNQANQLAHLRIE L D VEPDTRVAVSLRRGAEMVVAL LGILKAGGAYVPIDPDLPSARQAY                |     |
| EntF-SyrE-A1 | TSVDLMSTSEHQQLATFN DTAHPYPRDVL I HQ LIEQQAAQRPDACAVRGDSGPLLTYAELNQANQLAHLRIE L D VEPDTRVAVSLRRGAEMVVAL LGILKAGGAYVPIDPDLPSARQAY                       |     |
|              | 549                                                                                                                                                   | 668 |
|              | 1A-04 MLEDSSFPQAVL TTRDLS DNLPASDL PVLVLDGHDDRAQLARQQSVNPDAKALGLQP NHLAYVLYTSGSTGT PKGMVNEHLGVNRRLLWARDAYQVNSQDRVLQKTPFGFDVSVWVEFFLPL                 |     |
|              | 1B-06 MLEDSSFPQAVL TTRDLS DNLPASDL PVLVLDGHDDRAQLARQQSVNPDAKALGLQP NHLAYVLYTSGSTGT PKGMVNEHLGVNRRLLWARDAYQVNSQDRVLQKTPFGFDVSVWVEFFLPL                 |     |
| EntF-SyrE-A1 | MLEDSSFPQAVL TTRDLS DNLPASDL PVLVLDGHDDRAQLARQQSVNPDAKALGLQP NHLAYVLYTSGSTGT PKGMVNEHLGVNRRLLWARDAYQVNSQDRVLQKTPFGFDVSVWVEFFLPL                       |     |
|              | 669                                                                                                                                                   | 788 |
|              | 1A-04 LAGAELVMA L PGGHQDPDYLAQVMSDAGITLLHFVPSMLDVFLEHRSTRDFPQLRRVLCSGEALPRALQRRFEQQLKGVELHNLNYGPTAAIDVTAWECRPTDPGDSVPIGRPIANI Q I H                   |     |
|              | 1B-06 LAGAELVMA L PGGHQDPDYLAQVMSDAGITLLHFVPSMLDVFLEHRSTRDFPQLRRVLCSGEALPRALQRRFEQQLKGVELHNLNYGPTAAIDVTAWECRPTDPGDSVPIGRPIANI Q I H                   |     |
| EntF-SyrE-A1 | L TGAELVMA L PGGHQDPDYLAQVMSDAGITLLHFVPSMLDVFLEHRSTRDFPQLRRVLCSGEALPRALQRRFEQQLKGVELHNLNYGPTAAIDVTAWECRPTDPGDSVPIGRPIANI Q I H                        |     |
|              | 789                                                                                                                                                   | 908 |
|              | 1A-04 VLDALGQLQPMGVAGELHIGGIGVARGYLNQPQLSAERFIADPFNSNDPQARLYKTDG D VGRWLANGAL EYLRNDFQVKIRGLRIEIGIEEALAKHPAVHEAVVTAREDI PGDKRLVAYY                    |     |
|              | 1B-06 VLDALGQLQPMGVAGELHIGGIGVARGYLNQPQLSAERFIADPFNSNDPQARLYKTDG D VGRWLANGAL EYLRNDFQVKIRGLRIEIGIEEALAKHPAVHEAVVTAREDI PGDKRLVAYY                    |     |
| EntF-SyrE-A1 | VLDALGQLQPMGVAGELHIGGIGVARGYLNQPQLSAERFIADPFNSNDPQARLYKTDG D VGRWLANGAL EYLRNDFQVKIRGLRIEIGIEEALAKHPAVHEAVVTAREDI PGDKRLVAYY                          |     |
|              | 909                                                                                                                                                   |     |
|              | 1A-04 TQSAEHTAVDLEALRSHLQQVLP EYMPVPAIYV LLEAMPLT SNGK LDRKALPA                                                                                       |     |
|              | 1B-06 TQSAEHTAVDLEALRSHLQQVLP EYMPVPAIYV LLEAMPLT SNGK LDRKALPA                                                                                       |     |
| EntF-SyrE-A1 | TQSAEHTAVDLEALRSHLQQVLP EYMPVPAIYV LLEAMPLT SNGK LDRKALPA                                                                                             |     |
|              | 1                                                                                                                                                     | 120 |
|              | 6A-16 MAHHHHHHVGTMLLQSM TSDP I ARNSDLVSLFREVAATAPERTALS A EDDR I S Y GRLDAWSDAVARTLLAEGV R PGDRVALRMSPGA EAIVA I LA I LKCGAA YVPDLRNPVSRSDFI LA       |     |
|              | 6B-19 MAHHHHHHVGTMLLQSM TSDP V ARNSDLVSLFREVAATAPERTALS V EDDR I S Y GRLDAWSDAVARTLLAEGV R PGDRVALRMSPGA EAIVA I LA I LKCGAA YVPDLRNPVSRSDFI LA       |     |
|              | 6C-06 MAHHHHHHVGTMLLQSM TSDP V ARNSDLVSLFREVAATAPERTALS V EDDR I S Y GRLDAWSDAVARTLLAEGV R PGDRVALRMSPGA EAIVA I LA I LKCGAA YVPDLRNPVSRSDFI LA       |     |
| AdmK-CytC1-A | MAHHHHHHVGTMLLQSM TSDP I ARNSDLVSLFREVAATAPERTALS A EDDR I S Y GRLDAWSDAVARTLLAEGV R PGDRVALRMSPGA EAIVA I LA I LKCGAA YVPDLRNPVSRSDFI LA             |     |
|              | 121                                                                                                                                                   | 240 |
|              | 6A-16 DSGASALIGEPHEGCAVTRVVRTAAVAECKDAEPGPV T GAPGPAEDMAYV I YTS G TGNPKGV PVRHANV LALLAGAPSV FDFSGDDR WLLFHLSL S FDFSVWE V WGA FSTGAELV V LPH        |     |
|              | 6B-19 DSGASALIGEPHEGCAVTRVVRTAAVAECKDAEPGPV T GAPGPAEDMAYV I YTS G TGNPKGV PVRHANV LALLAGAPSV FDFSGDDR WLLFHLSL S FDFSVWE V WGA FSTGAELV V LPH        |     |
|              | 6C-06 DSGASALIGEPHEGCAVTRVVRTAAVAECKDAEPGPV T GAPGPAEDMAYV I YTS G TGNPKGV PVRHANV LALLAGAPSV FDFSGDDR WLLFHLSL S FDFSVWE V WGA FSTGAELV V LPH        |     |
| AdmK-CytC1-A | DSGASALIGEPHEGCAVTRVVRTAAVAECKDAEPGPV T GAPGPAEDMAYV I YTS G TGNPKGV PVRHANV LALLAGAPSV FDFSGDDR WLLFHLSL S FDFSVWE V WGA FSTGAELV V LPH              |     |
|              | 241                                                                                                                                                   | 360 |
|              | 6A-16 WAARTPEQYLAVI I DRGVTVINQTPTAFI V L I EAAV R GGRDV SGLRYV I FGGEKLT V PMLR E WAKAFGLDRPRLVNGYGITETT V FTTFEE I TEAYLAQDAS I I GRALP SFGTRVVGDDG |     |
|              | 6B-19 WAARTPEQYLAVI I DRGVTVINQTPTAFI V L I EAAV R GGRDV SGLRYV I FGGEKLT V PMLR E WAKAFGLDRPRLVNGYGITETT V FTTFEE I TEAYLAQDAS I I GRALP SFGTRVVGDDG |     |
|              | 6C-06 WAARTPEQYLAVI I DRGVTVINQTPTAFI V L I EAAV R GGRDV SGLRYV I FGGEKLT V PMLR E WAKAFGLDRPRLVNGYGITETT V FTTFEE I TEAYLAQDAS I I GRALP SFGTRVVGDDG |     |
| AdmK-CytC1-A | WAARTPEQYLAVI I DRGVTVINQTPTAFI A L I EAAV R GGRDV SGLRYV I FGGEKLT A PMLR E WAKAFGLDRPRLVNGYGITETT V FTTFEE I TEAYLAQDAS I I GRALP SFGTRVVGDDG       |     |
|              | 361                                                                                                                                                   | 480 |
|              | 6A-16 RDVAPGETGELWLSGAQLAEGYLRRLPELTA EKFP E V T DEK TGESVRYYRTGD L VSEL PDGRFAYEGRADL Q I KLRGYR I ELSDI E TAVRRHDDVVDVAVTVREFKPGDLRLVCAYVAREG       |     |
|              | 6B-19 RDVAPGETGELWLSGAQLAEGYLRRLPELTA EKFP E V T DEK TGESVRYYRTGD L VSEL PDGRFAYEGRADL Q I KLRGYR I ELSDI E TAVRRHDDVVDVAVTVREFKPGDLRLVCAYVAREG       |     |
|              | 6C-06 RDVAPGETGELWLSGAQLAEGYLRRLPELTA EKFP E V T DEK TGESVRYYRTGD L VSEL PDGRFAYEGRADL Q I KLRGYR I ELSDI E TAVRRHDDVVDVAVTVREFKPGDLRLVCAYVAREG       |     |
| AdmK-CytC1-A | RDVAPGETGELWLSGAQLAEGYLRRLPELTA EKFP E V T DEK TGESVRYYRTGD L VSEL PDGRFAYEGRADL Q I KLRGYR I ELSDI E TAVRRHDDVVDVAVTVREFKPGDLRLVCAYVAREG             |     |
|              | 481                                                                                                                                                   |     |
|              | 6A-16 SATTARELRNH I K TLLPAYMHPARYLPL R L PRTVNGKVDRAAVARSAS                                                                                          |     |
|              | 6B-19 SATTARELRNH I K TLLPAYMHPARYLPL R L PRTVNGKVDRAAVARSAS                                                                                          |     |
|              | 6C-06 SATTARELRNH I K TLLPAYMHPARYLPL R L PRTVNGKVDRAAVARSAS                                                                                          |     |
| AdmK-CytC1-A | SATTARELRNH I K TLLPAYMHPARYLPL G L PRTVNGKVDRAAVARSAS                                                                                                |     |
|              | 1                                                                                                                                                     | 120 |
|              | 5A-06 MAHHHHHHVGTMHKMTENEKEL I LHFNNKT D YPKNKT LHELFE EQAMK TPDHTALVFGAQRMTYRELNEKANQTARLLREKGI GRGSI AAI IADRSFEMI IGI I GILKAGGAYLP IDP E          |     |
| AdmK-BacA-A1 | MAHHHHHHVGTMHKMTENEKEL I LHFNNKT D YPKNKT LHELFE EQAMK TPDHTALVFGAQRMTYRELNEKANQTARLLREKGI GRGSI AAI IADRSFEMI IGI I GILKAGGAYLP IDP E                |     |
|              | 121                                                                                                                                                   | 240 |
|              | 5A-06 TP KDRI AFMLSDTKAAVLLT QGKAADGIDCEAD I VQLDREASDGF SKEPLSVNDSGDTAY I I YTS G TGT PKGVI TPHYSVIRVQNTNY IDITEDDDV I LQLSNYSF DGSVDF I FGALL       |     |
| AdmK-BacA-A1 | TP KDRI AFMLSDTKAAVLLT QGKAADGIDCEAD I VQLDREASDGF SKEPLSVNDSGDTAY I I YTS G TGT PKGVI TPHYSVIRVQNTNY IDITEDDDV I LQLSNYSF DGSVDF I FGALL             |     |
|              | 241                                                                                                                                                   | 360 |
|              | 5A-06 NGASLVMI EKEALLNINRLGSAINEEKVSVMF I T T ALFNMIAD I HVDCLSNLRK I LFGGERAS I PHVRKVLNHVGRDKL I HVYGPTESTVYATY Y FINEIDDEAETIP I GSP LANTS VLI     |     |
| AdmK-BacA-A1 | NGASLVMI EKEALLNINRLGSAINEEKVSVMF I T T ALFNMIAD I HVDCLSNLRK I LFGGERAS I PHVRKVLNHVGRDKL I HVYGPTESTVYATY Y FINEIDDEAETIP I GSP LANTS VLI           |     |
|              | 361                                                                                                                                                   | 480 |
|              | 5A-06 MDEAGKLVPIGVPGELCIAGDGLSKGYLNREELTA EKFI P H PFI P GERLYKTGD LAKWLPDGNIEFI GRIDH QV KIRGFRIELGEIESRLEMHEDINET V TVTVEDEESRPYICAYITAN            |     |
| AdmK-BacA-A1 | MDEAGKLVPIGVPGELCIAGDGLSKGYLNREELTA EKFI P H PFI P GERLYKTGD LAKWLPDGNIEFI GRIDH QV KIRGFRIELGEIESRLEMHEDINET V TVTVEDEESRPYICAYITAN                  |     |
|              | 481                                                                                                                                                   |     |
|              | 5A-06 REI SLDELKGF LGEKLP E YMI PAYFVKL DKLPLTKNGKVDRAALPEPAS                                                                                         |     |
| AdmK-BacA-A1 | REI SLDELKGF LGEKLP E YMI PAYFVKL DKLPLTKNGKVDRAALPEPAS                                                                                               |     |
