# Supplementary material
Source: PubMed Central journal article supplement (PMC1924594)

***admK* KO cosmid +  
AdmK**

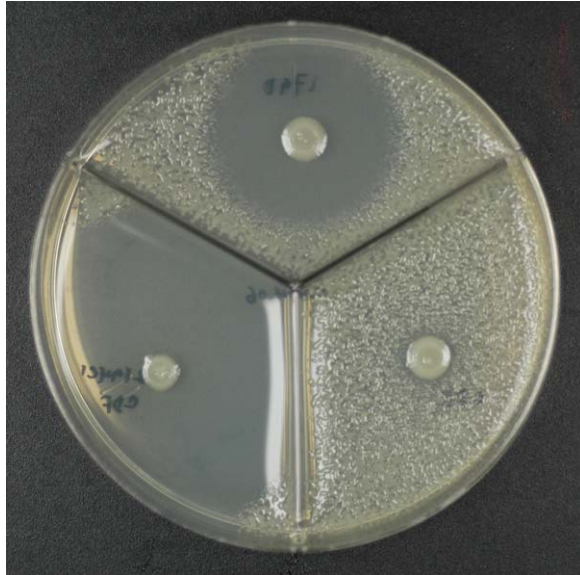

**Wild-type cosmid +  
Empty vector**

***admK* KO cosmid +  
Empty vector**

Supplement: pnas_0705348104_2.pdf [file pnas_0705348104_2.pdf]
